# Supplementary material for: A Multi-Institution Phase I Trial of Ruxolitinib in Patients with Chronic Myelomonocytic Leukemia (CMML)
Source: Oxford University Press journal article supplement (doi:10.1158/1078-0432.ccr-15-2781), 2016-02-08
Supplement: 10780432ccr152781-sup-158316_1_supp_3290269_607066.xlsx [file 10780432ccr152781-sup-158316_1_supp_3290269_607066.xlsx]

## Sheet: Sheet1
Subject	Day	Dose Level	Adverse event description	Grade
006	5	1	abdominal distension	2
002	13	1	abdominal distention	2
010-2	13	2	anemia	1
015-3	1	3	alopecia	1
010-2	13	2	decrease protein	1
015-3	25	3	Anemia	1
015-3	33	3	Papulopustular Rash-forehead/hairline	1
015-3	21	3	alt increased	1
015-3	21	3	ast increase	1
014-2	33	2	increase alt	1
019-3	1	3	increase bilirubin	1
019-3	9	3	increase bilirubin	1
015-3	33	3	AST increased	1
014-2	9	2	anemia	2
015-3	33	3	ALT increased	2
002	13	1	anorexia	2
007	1	1	anorexia	2
014-2	9	2	anorexia	1
015-3	1	3	anxiety	2
015-3	1	3	anxiety	1
016-3	1	3	anxiety	1
002	1	1	Ascites	3
007	21	1	ascities	3
014-2	1	2	athletic foot	1
014-2	29	2	back muscle spasms	1
014-2	29	2	back pain	2
014-2	41	2	Back pain	1
010-2	33	2	increase creatinine	1
014-2	29	2	bilateral lower extremities edema	1
014-2	9	2	blurred vision	1
002	21	1	bruising	1
002-021	9	3	Low Hemoglobin	1
002	13	1	chills	1
007	21	1	chills	1
008	13	1	chills	1
011-2	1	2	chin numbness	1
002-025-4	13	4	Chronic Kidney Disease (eGFR 50)	2
015-3	1	3	cloudy urine	1
014-2	9	2	confusion	1
002	13	1	constipation	1
002-026-4	5	4	constipation	1
010-2	13	2	neutropenia	1
006	5	1	thrombocytopenia	2
005	5	1	contusion left elbow	1
005	5	1	contusion left shoulder	1
010-2	9	2	cough	2
014-2	9	2	cough	1
007	25	1	cough non productive	1
015-3	5	3	cracking of mucosa/mucositis	1
006	1	1	thrombocytopenia	3
014-2	25	2	dark stooks	1
010-2	1	2	decrease appetite	2
002-021	17	3	Dehydration	1
007	25	1	depression	1
002-025-4	9	4	Diarhea	1
002	17	1	diarrhea	1
002-021	21	3	Diarrhea	1
011-2	1	2	hyperuricemia	1
007	21	1	weakness	2
012-2	1	2	diarrhea	3
012-2	1	2	weakness	3
002	17	1	diverticulosis	2
014-2	9	2	dizziness	1
008	13	1	cramping calves	1
009	5	1	headache	2
014-2	9	2	dyspnea	1
002	1	1	early satiety	1
014-2	9	2	early satiety	1
006	5	1	edema ankles	1
002	21	1	edema bilateral legs	1
007	21	1	edema bilateral legs	2
007	21	1	edema lower back	2
010-2	1	2	intermittent cramping	1
015-3	1	3	intermittent headache	1
015-3	5	3	intermittent headache	1
008	1	1	syncope	2
008	13	1	syncope	3
014-2	9	2	fatigue	3
006	1	1	insomnia	2
019-3	9	3	fatigue	1
019-3	1	3	feet get cold	1
010-2	5	2	fever	1
010-2	29	2	fever	1
014-2	9	2	fever	1
005	5	1	fluid retention	1
008	1	1	tachycardia	1
002-021	33	3	Gout	1
002-021	29	3	Gout	1
005	5	1	head wound	1
005	5	1	dyspnea	2
002	5	1	headaches	1
007	21	1	increased shortness of breath	3
002	17	1	hematoma left knee	1
002	9	1	hemorrhoids	1
007	25	1	hoarseness	1
015-3	1	3	hot flashes	1
011-2	1	2	hypercalcemia	1
014-2	41	2	Hyperglycemia	3
015-3	1	3	hyperglycemia	1
015-3	25	3	Hyperglycemia	1
010-2	17	2	hyperkalemia	1
015-3	33	3	Hyperkalemia	1
011-2	1	2	hyperphosphatemia	1
010-2	33	2	hyperuricemia	1
015-3	1	3	intermittent dyspnea	1
015-3	5	3	hyperuricemia	1
015-3	29	3	Hyperuricemia	1
010-2	9	2	hypocalcemia	2
007	21	1	hypokalemia	1
010-2	17	2	increase creatinine	1
002-025-4	5	4	Nasal Congestion	1
014-2	9	2	increase creatinine	1
014-2	29	2	increase in bun	1
015-3	5	3	increase ldh	1
015-3	9	3	increase ldh	1
016-3	5	3	increase leukocytosis	3
016-3	5	3	increase phos	1
015-3	9	3	increase phosphorus	1
015-3	1	3	increased appetite	1
014-2	37	2	Increased AST	1
014-2	45	2	Increased BUN	1
014-2	45	2	Increased creatinine	1
008	5	1	increased protein	1
006	5	1	shortness of breath	2
014-2	37	2	Increased total protein	1
008	1	1	shortness of breath	3
007	1	1	insomnia	2
009	5	1	insomnia	2
019-3	1	3	intermittent anemia	1
011-2	1	2	shortness of breath	2
010-2	5	2	shortness of breath/intermittent	1
015-3	25	3	Intermittent Diarrhea	2
015-3	1	3	pruritus	1
014-2	13	2	intermittent fever	1
007	25	1	rash	1
015-3	21	3	rash	1
012-2	1	2	intermittent hyperglycemia	1
016-3	1	3	intermittent hyperglycemia	1
014-2	1	2	intermittent increase bun	1
015-3	1	3	rash/chest	1
009	5	1	double vision	1
002	13	1	intermittent rectal bleedig	1
010-2	1	2	joint pain	2
016-3	1	3	left knee edema	1
007	13	1	left upper quadrant spleen pain	1
006	5	1	leukocytosis	3
006	1	1	leukocytosis	3
011-2	1	2	leukocytosis	3
012-2	1	2	leukocytosis
006	5	1	abdominal pain	2
014-2	29	2	low sodium	1
010-2	5	2	malaise	2
007	1	1	constipation	1
010-2	1	2	costipation/intermittent	1
002	5	1	muscle aches	2
002-026-4	1	4	Myalgia	1
002-021	25	3	Myalgia (right knee sprain/pain) Torn mensicus	1
002	9	1	nasal congestion	1
007	25	1	diarrhea	1
019-3	5	3	nasal drainage	1
012-2	1	2	diarrhea	3
014-2	33	2	diarrhea	1
002	1	1	GERD	2
008	13	1	heart burn	2
010-2	9	2	night sweats	1
008	9	1	night sweats	1
014-2	9	2	non cardiac chest pain	1
010-2	29	2	non productive cough	2
002-021	33	3	Pain (right shoulder)	1
002-021	33	3	Pain (Thoracic/adbominal discomfort)	1
007	25	1	pain abdomen	2
002	21	1	pain/bilateral legs	1
015-3	13	3	painfull skin	1
015-3	1	3	intermittent diarrhea	1
002-025-4	5	4	Pedal Edema	1
002	21	1	pleural effusion	2
011-2	1	2	pleural effusion	2
007	25	1	pleural effusions bilateral	2
010-2	25	2	pleural infection	2
002	9	1	productive cough	2
010-2	25	2	productive cough	2
007	17	1	intermittent nausea	1
014-2	33	2	intermittent nausea	1
006	5	1	mucositis	2
011-2	1	2	mucositis	2
015-3	25	3	Renal calculi	3
014-2	5	2	right flank pain	1
019-3	5	3	scrathy throat	1
002	13	1	nausea	2
009	5	1	nausea	2
010-2	5	2	nausea	2
002	9	1	shortness of breath/intermittent	2
007	21	1	vomiting	1
014-2	13	2	skin flaking/palms	1
019-3	5	3	sneezing	1
012-2	1	2	somnolence	2
010-2	1	2	sore throat	1
010-2	5	2	sore throat	2
010-2	9	2	sore throat	2
010-2	29	2	sore throat	1
015-3	1	3	sore throat	1
015-3	33	3	Sore throat	1
002-021	17	3	syncope	1
002-025-4	9	4	Syncope	1
009	5	1	vomiting	1
002	9	1	vomiting/intermittent	1
007	25	1	tachycardia	1
011-2	1	2	bilateral leg edema	1
008	13	1	chest pain	2
005	5	1	fatigue	2
002-021	17	3	Upper respiratory infection	2
010-2	21	2	uri	2
010-2	29	2	uri	2
007	21	1	urinary frequency	1
007	21	1	urinary frequency	1
008	13	1	urinary urgency	1
015-3	25	3	UTI	3
015-3	1	3	vaginal infection	1
015-3	25	3	vaginal infection	1
008	5	1	fatigue	1
009	5	1	fatigue	2
010-2	25	2	fatigue	2
012-2	1	2	fatigue	3
016-3	1	3	fatigue	2
014-2	9	2	weakness	1
