# Supplementary material for: A Multi-Institution Phase I Trial of Ruxolitinib in Patients with Chronic Myelomonocytic Leukemia (CMML)
Source: Oxford University Press journal article supplement (doi:10.1158/1078-0432.ccr-15-2781), 2016-02-08
Supplement: 10780432ccr152781-sup-158316_1_supp_3290270_p070pp.xlsx [file 10780432ccr152781-sup-158316_1_supp_3290270_p070pp.xlsx]

## Sheet: Sheet1
Cohort	WHO	Cytogenetics	FAB	Level	On treatment	Off Treatment	Duration of Therapy	months	HMA therapy	IWG Response	Symptom Response	Spleen Response	Reason for Discontinuation	AML transformation
1	1	46,XY [20]	MPN	1	2013-09-04	2013-10-29	55	1.83333			abdominal pain	Yes	Progressive disease (splenomegaly)	no
1	1	46,XY[20]	MPN	1	2013-08-05	2013-10-03	58	1.93333	Yes				Progressive disease (CMML-2)	no
1	1	46,XY,i(17)(q10)[4]/46,XY[16]	MPN	1	2013-09-04	2014-01-03	119	3.96667	Yes				no response	no
1	1	46 XX[20]	MPN	1	2013-03-28	2013-09-12	164	5.46667	Yes	HI-E	fatigue, weight loss	Yes	Progressive disease (splenomegaly)	no
1	1	46,XY [20]	MDS	1	2013-07-02	2013-08-28	56	1.86667	Yes				Progressive disease (CMML-2)	no
1	1	46,XY [20]	MPN	1	2013-09-04	2014-02-26	172	5.73333			fatigue		Progressive disease (LAD, ascites)	no
2	1	46XX,del(20)(q11.2)[14]/46,xx[6]	MPN	2	2014-01-29	2014-02-27	28	0.933333	Yes				Progressive disease (abdominal pain)	no
2	1	46,XY[20]	MDS	2	2014-02-24	2015-05-08	434	14.4667			night sweats, pruritis, fatigue
2	1	46,XY[20]	MPN	2	2013-12-03	2015-05-08	515	17.1667	Yes	HI-P	fatigue	Yes
2	1	47XY, +8 [3]/45, XY,-7[17]	MDS	2	2013-12-11	2014-01-08	27	0.9	Yes				progressive disease (increased circulating blasts)	no
3	1	46,XX[20]	MPN	3	2014-05-19	2015-01-28	249	8.3		PR			Progressive disease (CMML-2)	no
3	1	46,XX [20]	MPN	3	2014-07-30	2014-12-17	137	4.56667					no response	no
3	1	46,XY [20]	MPN	3	2014-06-06	2014-07-30	54	1.8	Yes				progressive leukocytosis (WBC=300)	no
3	1	46,XY [20]	MDS	3	2014-08-04	2015-05-08	274	9.13333		HI-P	b-symptoms
3	1	46,XY [20]	MDS	3	2014-08-22	2015-05-08	256	8.53333			b-symptoms
4	1	46,XY [20]	MPN	4	2014-10-23	2014-12-18	55	1.83333		HI-P	abdominal pain	Yes	Expired secondary to congestive heart failure	no
4	1	46,XY [20]	MPN	4	2015-01-02	2015-04-17	105	3.5					progressive disease	no
4	1	47,XY,+8,del(11)(q22q23)[20]	MPN	4	2015-02-18	2015-05-08	80	2.66667
4	1	unknown	MDS	4	2014-12-08	2015-05-08	150	5			night sweats
4	1	unknown	MPN	4	2014-12-08	2015-05-08	150	5			night sweats	Yes
